# Supplementary material for: Cu(I) and Cu(II) Complexes Based on Lonidamine-Conjugated Ligands Designed to Promote Synergistic Antitumor Effects
Source: PubMed Central journal article supplement (PMC8965879; doi:10.1021/acs.inorgchem.1c03658), 2022-03-14
Supplement: ic1c03658_si_001.pdf [file ic1c03658_si_001.pdf]

# Supporting Information

## **Cu(I) and Cu(II) complexes based on Ionidamine-conjugated ligands designed to promote synergistic antitumor effects**

Fabio Del Bello,<sup>a</sup> Maura Pellei,<sup>\*b</sup> Luca Bagnarelli,<sup>b</sup> Carlo Santini,<sup>b</sup> Gianfabio Giorgioni,<sup>a</sup> Alessandro Piergentili,<sup>a</sup> Wilma Quaglia,<sup>\*a</sup> Chiara Battocchio,<sup>c</sup> Giovanna Iucci,<sup>c</sup> Irene Schiesaro,<sup>c</sup> Carlo Meneghini,<sup>c</sup> Iole Venditti,<sup>c</sup> Nitya Ramanan,<sup>d</sup> Michele De Franco,<sup>e</sup> Paolo Sgarbossa,<sup>f</sup> Cristina Marzano,<sup>e</sup> and Valentina Gandin<sup>e</sup>

<sup>a</sup>*School of Pharmacy, Medicinal Chemistry Unit, University of Camerino, via S. Agostino 1, 62032 Camerino, Italy*

<sup>b</sup>*School of Science and Technology, Chemistry Division, University of Camerino, via S. Agostino 1, 62032 Camerino, Italy*

<sup>c</sup>*Department of Science, Roma Tre University, Via della Vasca Navale 79, 00146, Roma, Italy*

<sup>d</sup>*Diamond Light Source, Harwell Science and Innovation Campus, Didcot, OX11 0DE, UK*

<sup>e</sup>*Department of Pharmaceutical and Pharmacological Sciences, University of Padova, via Marzolo 5, 35131 Padova, Italy*

<sup>f</sup>*Department of Industrial Engineering, University of Padova, via Marzolo 9, 35131 Padova, Italy*

## EXAFS data analysis details

The experimental Cu K edge X-ray absorption spectra were treated along the standard procedures for data normalization and extraction of the structural EXAFS signal.<sup>1</sup> The quantitative EXAFS analysis was carried out using the atomic coordinates of the two residues as starting point for the data refinement that was carried out fitting the  $k^2$  weighted structural signal  $k^2\chi(k)$  in the  $k$ -space (without Fourier Filtering) in the 3-15  $\text{\AA}^{-1}$   $k$ -range. The appropriate single (SS) and multiple (MS) scattering paths were selected on the basis of their amplitude and statistical significance,<sup>1</sup> grouping in a single contribution those paths with similar geometry and composition. To reduce the correlation among the parameters the path multiplicity numbers were constrained to the molecular structure (see Table 2 of the manuscript). The experimental data, best fit and examples of the used paths are presented in Figure 4 of the manuscript. The differences among the spectra of the three samples (Figure 4A) can be understood in a more intuitive way looking at the FT moduli  $|FT|$  (Figure 4B): the complex **10** data present a major main peak around 1.5  $\text{\AA}$  (uncorrected for the phase shift), originating from 2 N at around 2  $\text{\AA}$  and 2 Cl at around 2.2  $\text{\AA}$ . In the next neighbour region the two main  $|FT|$  features at around 2.5  $\text{\AA}$  and 3.5  $\text{\AA}$  (uncorrected for the phase shift) are ascribed, one to N(2) and C neighbours from the pyrazole rings (around 3  $\text{\AA}$ ), the other to the SS and MS paths to the C(2) atoms. These MS contributions are relevant due to the almost aligned configurations Cu-N-C(2), Cu-N(2)-C(2) and Cu-C-C(2).<sup>2</sup>

In complex **10**, R is a hydrogen atom, which is expected to provide a negligible EXAFS signal. On the contrary, the carbon atoms of  $\text{CH}_3$  groups of complex **16** are expected to provide a sizable signal.

The distances and mean square relative displacement (MSRD)  $\sigma^2$  obtained from the refinement are reported in Table 2 of the manuscript for SS contributions. In complex

**10** the distances demonstrate a good agreement with the expected molecular structure: the Cu-N nearest neighbour shell is found at 1.96 Å, the Cl is at 2.23 Å from Cu. The Cu-C and Cu-N(2) shells are indistinguishable in complexes **10** and **15** and a single contribution (N = 4) was used (the very similar backscattering amplitude and phase functions of C and N make them difficult to distinguish in the analysis). The analysis of complex **16** requires an additional Cu-C<sup>R</sup> contribution at around 1.89 Å. This finding definitively demonstrates the modification of Cu coordination geometry from roughly square planar (complex **10**) to roughly octahedral (complex **16**). This contribution is mandatory to achieve reliable fit; without it the Cu-Cl shell results unphysically short. It is possible that such additional contact originates from the CH<sub>3</sub> residue.

In complex **15** the Cu-N distance is slightly longer, due to the lower Cu(I) electronegativity providing a more loosely bound structure; a single contribution is used to reproduce the Cu-C and Cu-N(2) shells around 2.9 Å, but an additional contribution at around 3.3 Å is required. We likely assume that this last comes out from the C atoms of the phenyl rings linked to P (triphenylphosphine). In order to check the Cu(I) coordination number we refined the EXAFS signal using 2N+2P, 1N+2P and 2N+1P as Cu(I) nearest neighbour shells configurations. The best fit agreements were quantified looking at the weighted residual square function  $R_W^2$  resulting the lowest ( $R_W^2 = 0.080$ ) for 2N+2P with respect to the 1N+2P ( $R_W^2 = 0.084$ ) and 2N+1P ( $R_W^2 = 0.089$ ) models.

**Table S1.** XPS data analysis results: BE, FWHM, atomic percents and proposed assignments.

| Sample | Signal | BE<br>(eV) | FWHM<br>(eV) | Experimental<br>Atomic<br>Ratios | Theoretical<br>Atomic<br>Ratios | Assignment                |
|--------|--------|------------|--------------|----------------------------------|---------------------------------|---------------------------|
| 4      | C1s    | 284.70     | 1.47         | 9.5                              | 7.5                             | C-C aromatic              |
|        |        | 286.79     | 1.47         | 7.1                              | 3                               | C-N                       |
|        |        | 288.06     | 1.47         | 4.8                              | 2.5                             | NHCO, C=N                 |
|        |        | 289.40     | 1.47         | -                                | -                               | COOH impurities           |
|        |        | 291.90     | 1.47         | 1                                | 1                               | C-Cl                      |
|        | O1s    | 532.44     | 2.73         | 1                                | 1                               | C=O                       |
|        | N1s    | 399.21     | 2.89         | 1.6                              | 1.6                             | amine- or amide-like N-C  |
|        |        | 401.11     | 2.89         | 1                                | 1                               | imine-like N=C            |
|        | Cl2p   | 200.44     | 2.77         | 1                                | 1                               | C-Cl                      |
| 10     | C1s    | 284.70     | 1.55         | 10                               | 5.5                             | C-C aromatic and alifatic |
|        |        | 286.35     | 1.55         | 3                                | 3                               | C-N                       |
|        |        | 288.12     | 1.55         | 2                                | 2.5                             | NHCO, C=N                 |
|        |        | 289.63     | 1.55         | -                                | -                               | COOH impurities           |
|        |        | 291.24     | 1.55         | 1                                | 1                               | C-Cl                      |
|        | O1s    | 531.88     | 1.80         |                                  |                                 | C=O                       |
|        |        | 533.27     | 1.80         |                                  |                                 | C-O impurities            |
|        | N1s    | 399.70     | 3.49         | 1                                | 1                               | amine- or amide-like N-C  |
|        | Cl2p   | 198.00     | 1.75         | 1.4                              | 1                               | Cl-Cu (Cu(II) complex)    |
|        |        | 200.09     | 1.75         | 1                                | 1                               | C-Cl                      |
| Cu2p   | 936.62 | 3.24       | 1            |                                  | Cu(II)-complex                  |                           |
| 15     | C1s    | 284.70     | 1.75         | 21                               | 22.5                            | C-C aromatic and alifatic |
|        |        | 286.03     | 1.75         | 6                                | 7.5                             | C-N, C-P                  |

|    |                     |        |      |           |         |                          |
|----|---------------------|--------|------|-----------|---------|--------------------------|
|    |                     | 288.01 | 1.75 | 1.8       | 1.5     | NCO, C=N                 |
|    |                     | 291.74 | 1.75 | 1         | 1       | C-Cl                     |
|    | N1s                 | 399.97 | 2.74 | 1         | 1       | amine- or amide-like N-C |
|    | O1s                 | 531.53 | 3.57 | 1         | 1       | C=O                      |
|    | P2p <sub>3/2</sub>  | 131.15 | 2.00 | 1.6       | 2       | PPh <sub>3</sub>         |
|    |                     | 138.00 | 2.00 | 1         | 1       | PF <sub>6</sub>          |
|    | Cl2p <sub>3/2</sub> | 200.24 | 1.58 | 1         | 1       | C-Cl                     |
|    | Cu2p <sub>3/2</sub> | 932.37 | 2.22 | 1         | 1       | Cu(I) complex            |
|    | F1s                 | 685.88 | 2.23 | F/P = 5.4 | F/P = 6 | PF <sub>6</sub>          |
| 16 | C1s                 | 284.70 | 1.62 | 9.5       | 7.5     | C-C aromatic             |
|    |                     | 286.39 | 1.62 | 2.5       | 4.5     | C-N                      |
|    |                     | 288.33 | 1.62 | 1.3       | 1.5     | NHCO, C=N                |
|    |                     | 289.69 | 1.62 | -         | -       | COOH impurities          |
|    |                     | 291.15 | 1.62 | 1         | 1       | C-Cl                     |
|    | O1s                 | 531.72 | 1.91 |           |         | C=O                      |
|    |                     | 532.98 | 1.91 |           |         | C-O impurities           |
|    | N1s                 | 400.60 | 3.46 | 1         | 1       | amide- or amine-like N-C |
|    | Cl2p                | 198.01 | 1.62 | 1.3       | 1       | Cl-Cu (Cu(II) complex)   |
|    |                     | 200.13 | 1.62 | 1         | 1       | C-Cl                     |
|    | Cu2p                | 935.92 | 2.54 | 1         |         | Cu(II) complex           |

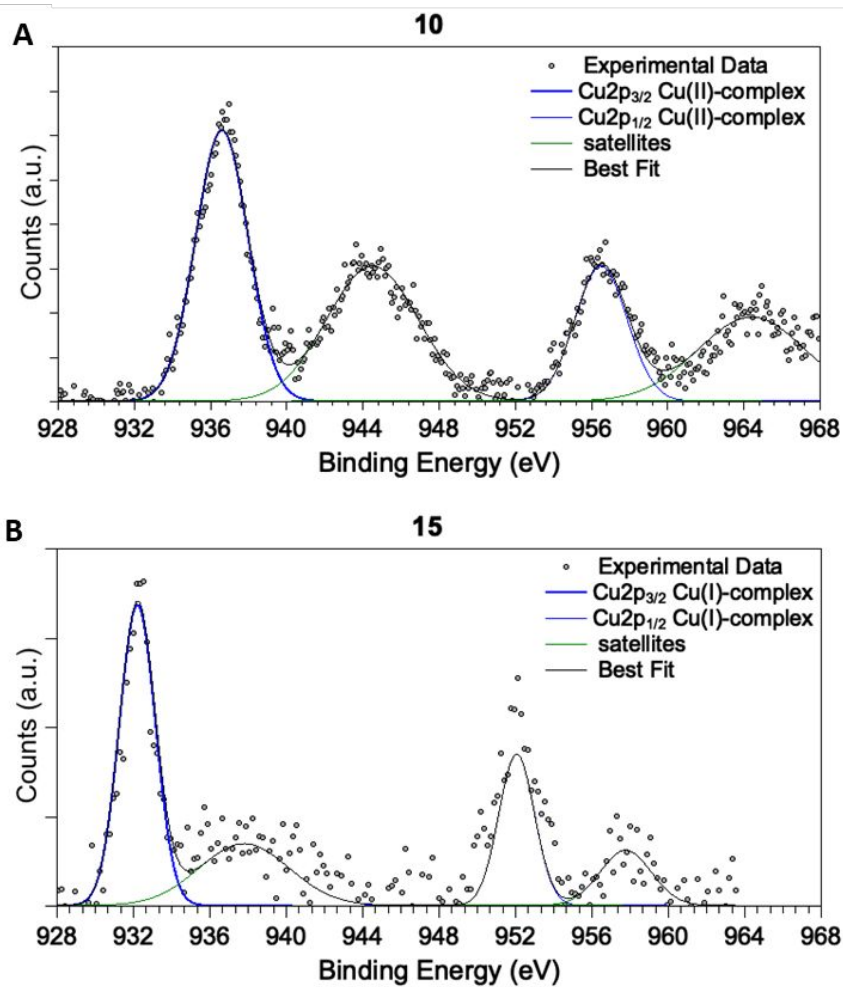

**Figure S1.** XPS Cu<sub>2</sub>p spectrum of Cu(II) complex **10** (A) and Cu(I) complex **15** (B).

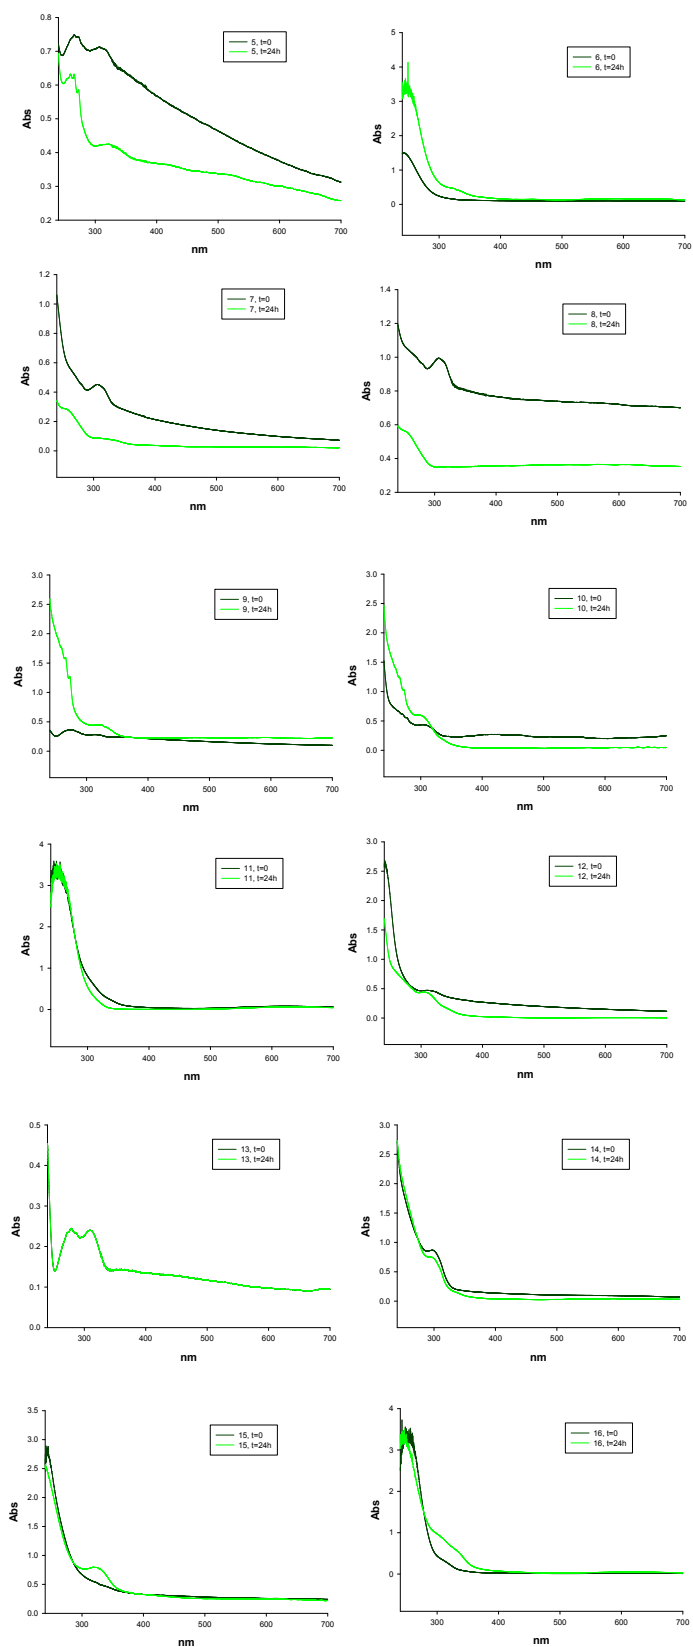

**Figure S2.** Stability studies. All complexes were dissolved at 50  $\mu$ M in 0.5% DMSO/RPMI. UV-visible spectra were recorded at t = 0 min and t = 1440 min = 24 h.

## References

1. Meneghini, C.; Bardelli, F.; Mobilio, S. ESTRA-FitEXA: A software package for EXAFS data analysis. *Nucl. Instrum. Methods Phys. Res., Sect. B* **2012**, 285, 153-157, DOI: <https://doi.org/10.1016/j.nimb.2012.05.027>.
2. Meneghini, C.; Morante, S. The active site structure of tetanus neurotoxin resolved by multiple scattering analysis in X-ray absorption spectroscopy. *Biophys. J.* **1998**, 75 (4), 1953-1963, DOI: 10.1016/s0006-3495(98)77636-2.
